# Supplementary material for: LncRNA LINC00313 Knockdown Inhibits Tumorigenesis and Metastasis in Human Osteosarcoma by Upregulating FOSL2 through Sponging miR-342-3p
Source: PubMed Central journal article supplement — Yonsei Med J. 2020 Apr 24;61(5):359–70. doi: 10.3349/ymj.2020.61.5.359 (PMC7214116; doi:10.3349/ymj.2020.61.5.359), 2020-04-24
Supplement: ymj-61-359-s001.pdf [file ymj-61-359-s001.pdf]

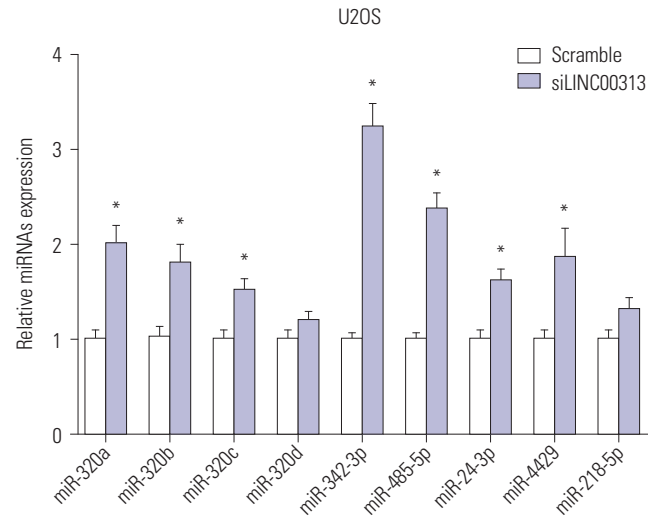

**Supplementary Fig. 1.** The regulatory effect of LINC00313 silencing on miRNAs in U2OS cells. Expression levels of miRNAs were measured by qPCR in U2OS cells transfected with scrambled siRNA (scramble) or siLINC00313. miR-342-3p was the most upregulated miRNA by LINC00313 silencing.
